# Supplementary material
Source: publisher site journal article supplement (https://www.dovepress.com/article/576858)
Supplement: Supplementary file 1 [file 576858%20Supplementary%20Data.docx]

**Supplementary Figures and Tables**

**Table S1** Group classification for multinomial and binary models of BM and PB EVs

| **Bone Marrow Samples** | | | | | |
| --- | --- | --- | --- | --- | --- |
| **Name** | **Type** | | **Control** | **Diseased (1)** | **Diseased (2)** |
| General asymptomatic / symptomatic MM | | Multinomial | N | MGUS | ID + REL + REM |
| Active symptomatic MM | | Binary | N + MGUS | ID + REL | - |
| **Peripheral Blood Samples** | | | | | |
| General asymptomatic / symptomatic MM | Multinomial | | N | MGUS | ID + REL + REM |
| MGUS | Binary | | N | MGUS | - |
| Initial Diagnosis | Binary | | N + MGUS | ID | - |
| Relapse | Binary | | N + REM | REL | - |

**Table S2** Treatment regimens of MM patients

| **Patient ID** | **Disease Status** | **Diagnosis** | **Treatment Received** |
| --- | --- | --- | --- |
| P33 | Initial diagnosis | Multiple Myeloma | CyBorD Chemotheraphy |
| P39 | Initial diagnosis | IgG lambda Multiple Myeloma (2021) | VTD |
| Thalidomide + Prednisolone |
| P40 | Initial diagnosis | MGUS (2012) transformed into Multiple Myeloma (2017) | RVD + Lenalidomide maintenance |
| DVD |
| Pomalidomide + Velcade + Dexamethasone + C7D23 |
| P43 | Initial diagnosis | IgA lambda Multiple Myeloma (2016) | Iaxzomib |
| Prednisolone and a low dose of Thalidomide |
| P45 | Initial diagnosis | IgA Kappa Multiple Myeloma | Thalidomide |
| Xgeva |
| P47 | Initial diagnosis | IgG kappa Mutiple Myeloma (2013) | VTD |
| Pomalidomide/Prednisolone |
| Zometa |
| IVIG |
| P50 | Initial diagnosis | Multiple Myeloma | Pomalidomide/Dexamethasone |
| Pomalidmide + Dexamethasone |
| P53 | Initial diagnosis | (1) Light Chain Multiple Myeloma diagnosed in October 2017 | Bortezomib + Dexamethasone |
| Zometa |
| P55 | Initial diagnosis | IgG multiple myeloma, progression from smouldering myeloma, ISS stage 2, Baseline plasmacytosis 40% | Lenalidomide + Prednisolone |
| Velcade + Dexamethasone |
| Pomalidomide + Prednisolone |
| DVD |
| P57 | Initial diagnosis | IgG lamda multiple myeloma stage 3 (2018) | Surgical decompression + radiotheraphy RVD x7 |
| ASCT |
| Revlimid + Bortezomib |
| P10 | Initial diagnosis | IgG Kappa Multiple Myeloma (diagnosed 25/2/2015) | RsqVD |
| Revlimid 15mgs PO od (3 weeks on/ 1 week off) |
| IVIG + Zometa |
| Daratumumab + Vel + Dex |
| P21 | Initial diagnosis | IgA Lambda Multiple Myeloma diagnosed November 2015 | RVD SC |
| ASCT |
| Velcade/Lenalidomide 15 mg daily 21 days out of 28 |
| Velcade + Revlimid |
| P34 | Remission | kappa light chain Multiple Myeloma (2020) | RVD |
| stem cell transplant |
| Revlimid |
| P30 | Remission | IgG Lambda Multiple Myeloma Aug 2019 | RVD |
| Velcade (every two weeks) + Revlimid 10mg (day 1-21) + Pomalidomide, Velcade, Dexamethasone (to commenced January 2021 and discontinued April 2022 due to intolerance (insomnia, fatigue)) |
| Zometa + Daratumumab + Velcade + Dex |
| P20 | Remission | IgG Kappa Multiple Myeloma diagnosed February 2011 | VTD chemotherapy |
| ASCT |
| Thalidomide 50mgs |
| Revlimid 10mgs |
| PVD |
| Second ASCT |
| Pomalidomide 4mg 3 weeks on/1 week off |
| P5 | Remission | IgG Lambda Myeloma diagnosed March 2020 ISS 1 FISH- IGH – CCND1 translocation | Revlimid 25mg |
| Velcade |
| Dexamethasone 40 mg |
| Carfilzomib |
| Carfilzomib 27 mg/m2 |
| Zometa |
| stem cell transplant |
| Revlimid 15mg - 21 days on one week off |
| Xgeva |
| P41 | Relapse | IgG Kappa multiple myeloma (2014) ISS 3 | RVD |
| Stem cell transplant + two additional lines of RVD and DVD |
| KRD |
| P42 | Relapse | IgA lambda Multiple Myeloma (2011) | RVD |
| ASCT |
| Thalidomide |
| PVD |
| Pom/Pred |
| Iaxzomib/Lenalidomide |
| Revlimid |
| Ixazomib + Dexamethasone |
| DVD + Cyclophosphamide (added due to suboptimal response) |
| Len/Dex |
| Bisphosphonate |
| P46 | Relapse | Kappa light chain Multiple Myeloma (2015) | RSqVD |
| Bone marrow transplant |
| Revlimid |
| Pomalidomide and Dexamethasone |
| KRD |
| Daratumunab |
| Pomalidomide + Velcade + Dexamethasone |
| Belantamab |
| DVD, Daratumumab, Velcade, Dexamethsome, along with Thaildomide. |
| P49 | Relapse | Kappa light chain Mutiple Myeloma (2015) | RSQVD |
| Bone marrow transplant + Revlimid |
|  |
| Pomalidomide and Dexamethasone |
| KRD |
| Daratumumab |
| Pomalisomide, Velcade and Dexamethasone |
| Belantamab |
| DVD + Thalidomide. |
| P51 | Relapse | IgG kappa Myeloma in VGRP | Stem cell transplant |
| Lenalidomide + Dexamethosone |
| Pomalidomide, Prednisolone, Pomalidomide 4mg |
| Prednisolone 30mg |
| Zometa + IVIG |
| P52 | Relapse | relapsed IgG lamda multiple myeloma | Velcade + Dexamethasone, then Lenalidomide/Dexamethasone |
| Pomalidomide/Dexamethasone |
| Pomalidomide/Prednisolone |
| Ixzomib + Lenalidomide + Dexamethasone |
| Prednisolone. |
| P54 | Relapse | IgG kappa Multiple Myeloma (2021) | Dexamethasone + Revlimid |
| VTD |
| Immunotherapy Daratumumab |
| P24 | Relapse | Refractory oligosecretory IgA Kappa Multiple Myeloma (diagnosed 07/2019) | CyBorD C6 |
| Daratumumab + Velcade + Dexamethasone |
| #1:1 KrD |
| #4:8 K(R)D |

**Figure S1** Quantification of EVs using flow cytometry demonstrated similar concentration present in BM and PB from MM, MGUS and normal control EVs

**Figure S1** Quantification of EVs using flow cytometry demonstrated similar concentration present in BM and PB samples. Data are presented as mean ± standard error of the mean (SEM). Statistical comparisons were performed using one-way ANOVA; *p* ≤ 0.05 was considered statistically significant, and “ns” denotes not significant


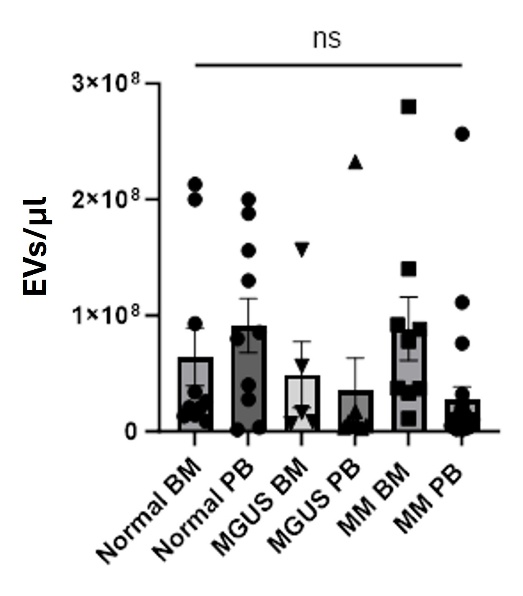


**Figure S2** Biological process and pathway enrichment analysis of proteins from MM BM EVs that were significantly altered in abundance (*p* < 0.05) in active symptomatic MM


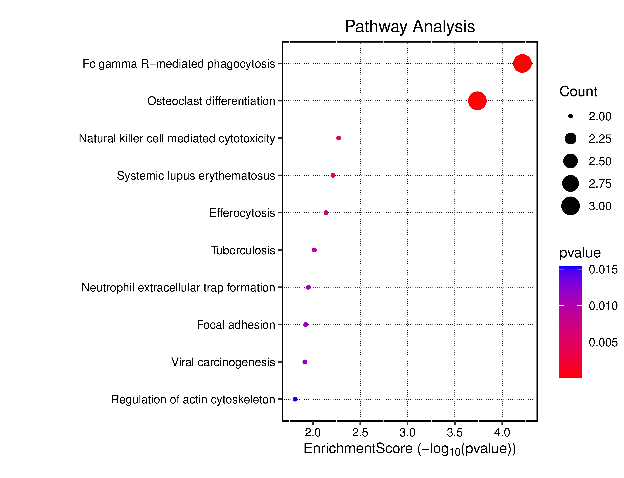

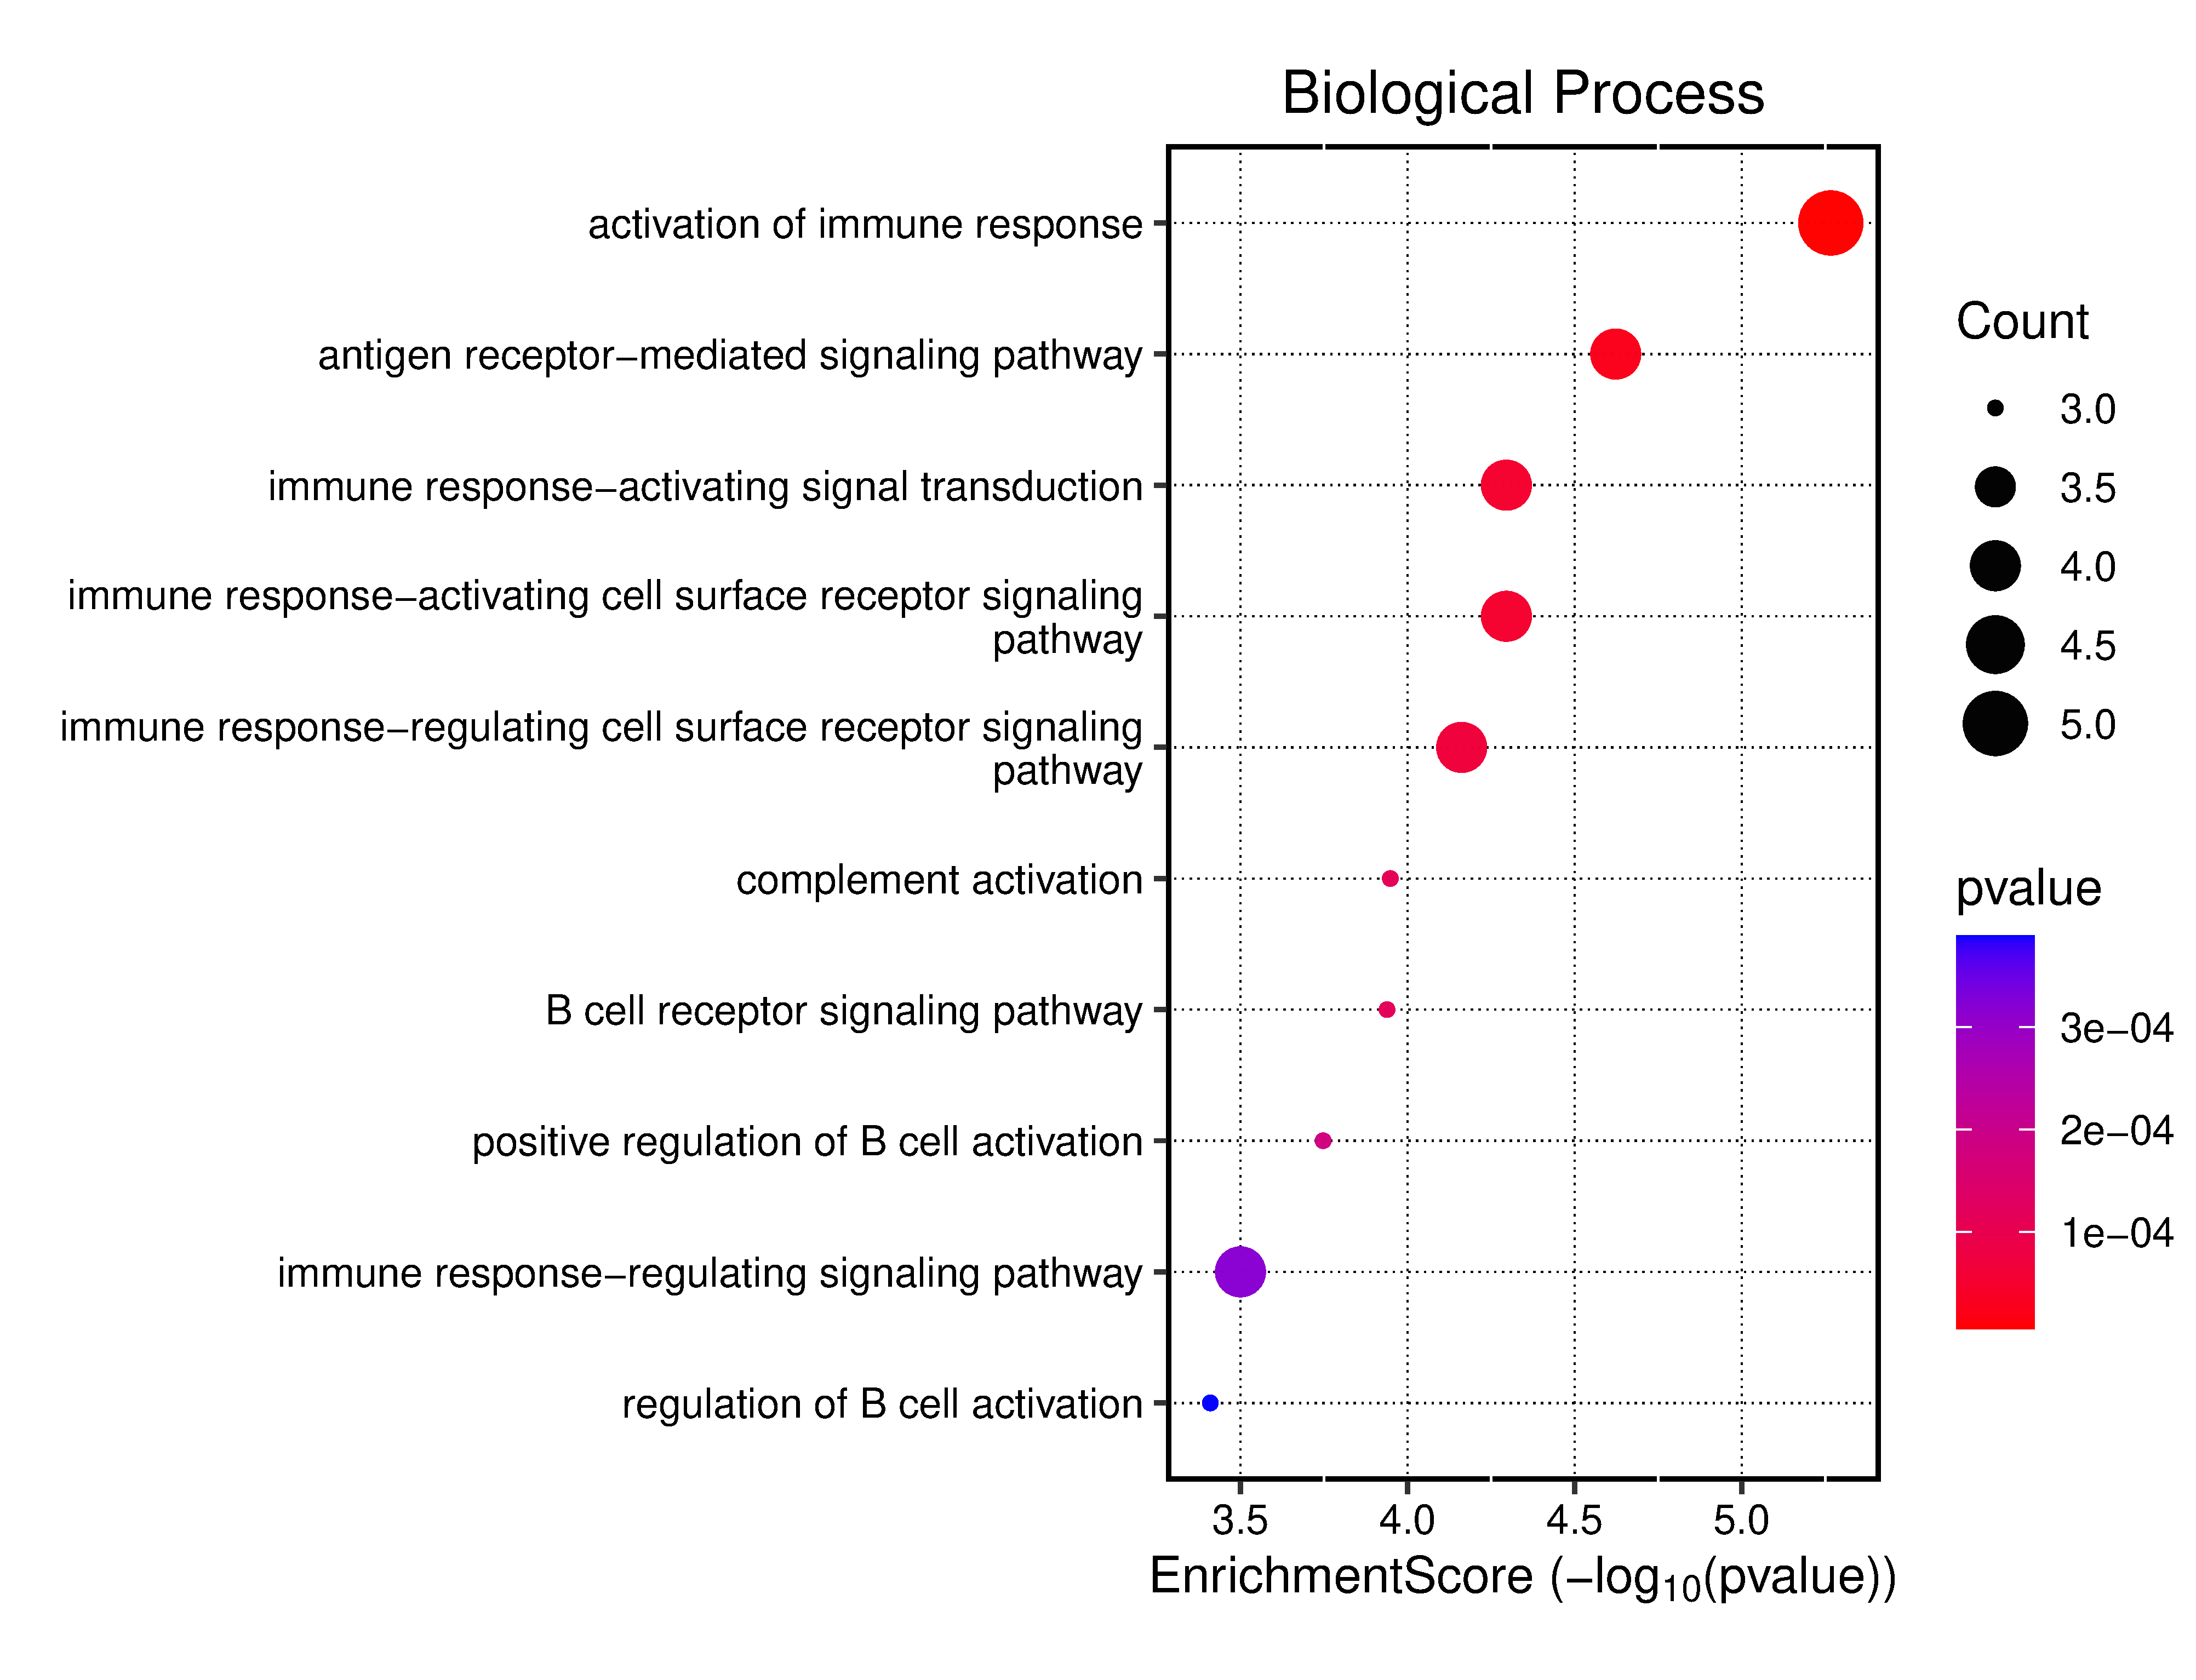


|  |  |  |  | F1 | Accuracy | Sensitivity | Specificity | PPV | NPV | AUC |
| --- | --- | --- | --- | --- | --- | --- | --- | --- | --- | --- |
| General Asymptomatic | C8G, GLIPR2, | Multinomial | Normal | 0.86 | 0.74 | 0.81 | 0.9 | 0.91 | 0.85 | 0.89 |
| / Symptomatic MM | FGG, ENO1 | Logistic | Asymptomatic | NaN | NaN | 0.88 | NaN | NaN |
|  |  | Regression | Symptomatic | 0.75 | 0.68 | 0.82 | 0.83 | 0.77 |
| Active Symptomatic MM | FGG, ENO1 | Linear SVM |  | 0.84 | 0.88 | 0.93 | 0.85 | 0.76 | 0.96 | 0.98 |
|  |  | Logistic Regression |  | 0.91 | 0.93 | 0.9 | 0.95 | 0.93 | 0.95 | 0.94 |
|  |  | Decision Tree |  | 0.7 | 0.77 | 0.68 | 0.82 | 0.72 | 0.84 | 0.75 |

**Table S3** Performance evaluation of multinomial (logistic regression) and binary (linear SVM, logistic regression, decision tree) MM BM EV classification models.


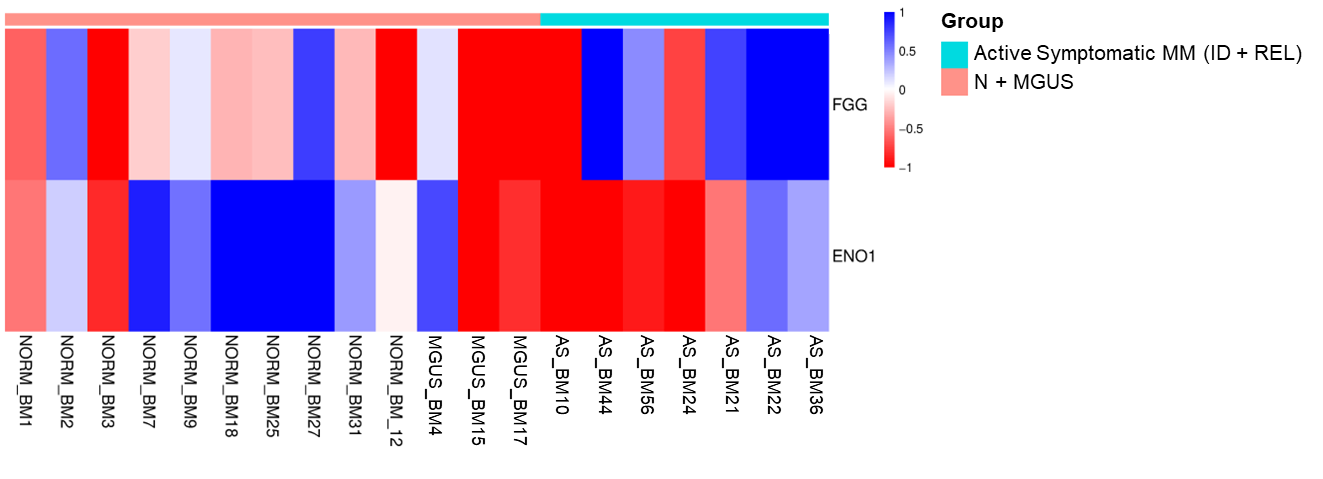


**Figure S3** Heatmap of ML–selected protein markers FGG and ENO1 levels in active symptomatic MM samples, compared to their respective controls


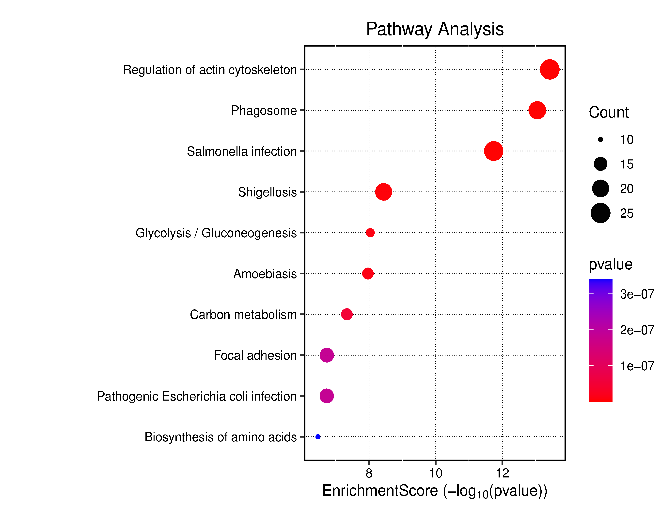

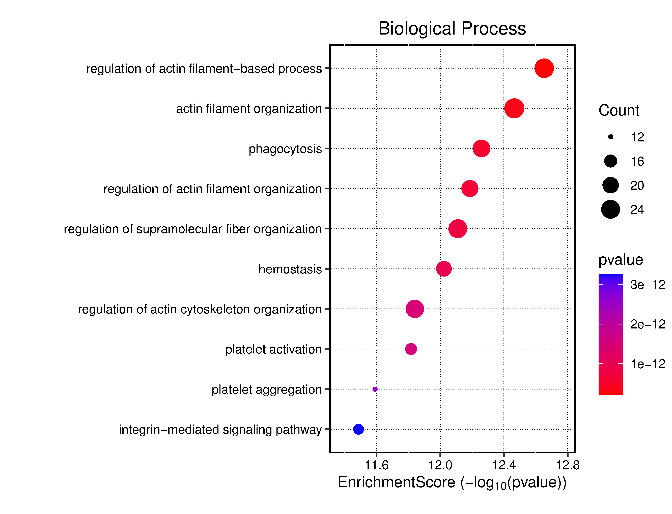

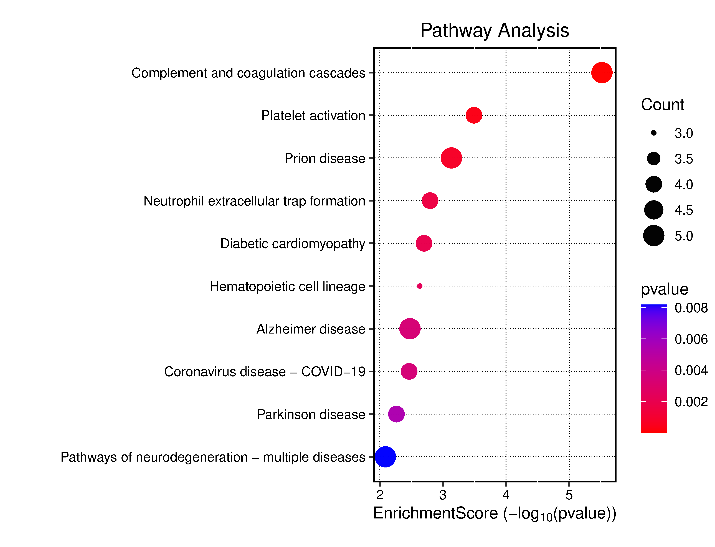

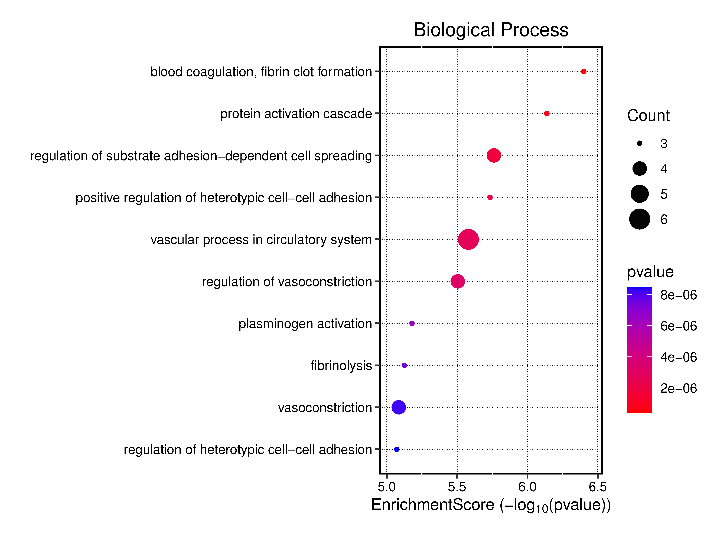

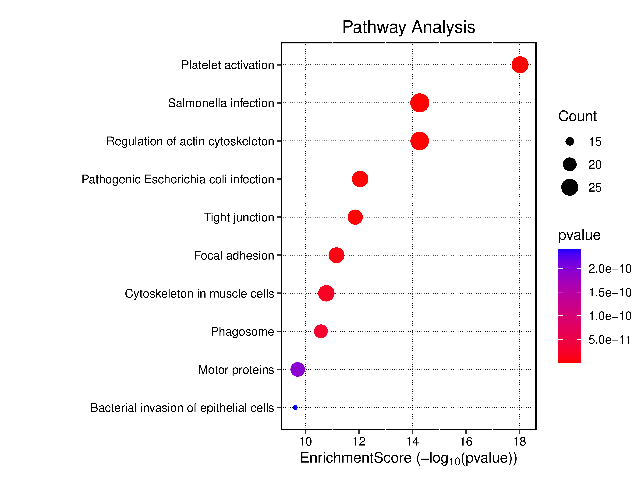

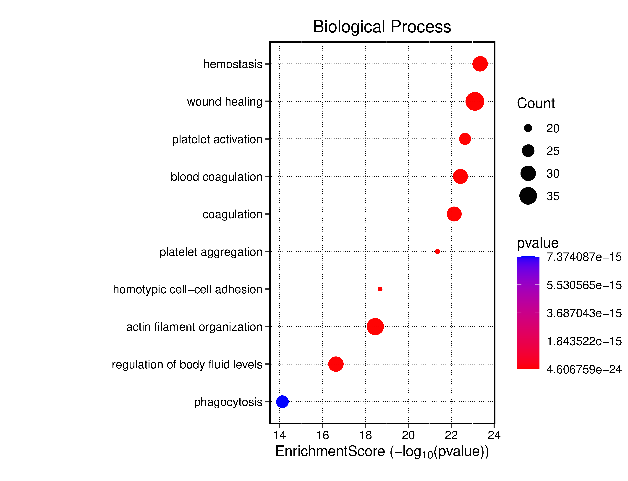


**A**

**B**

**C**

**Figure S4** Biological process and pathway enrichment analysis of proteins from MM PB EVs that were significantly altered in abundance (*p* < 0.05). (A) MGUS, (B) initial diagnosis, and (C) relapse patients.

**Table S4** Evaluation of four MM PB EV diagnostic and stratification models. Multinomial (logistic regression) and binary (linear SVM, logistic regression, decision tree) MM PB EV classification models.

|  |  |  |  | F1 | Accuracy | Sensitivity | Specificity | PPV | NPV | AUC |
| --- | --- | --- | --- | --- | --- | --- | --- | --- | --- | --- |
| General Asymptomatic | ALAD, S100A7, |  | Normal | 0.89 | 0.87 | 0.9 | 0.93 | 0.88 | 0.96 | 0.95 |
| / Symptomatic MM | APOC1,LGALS1, | Multinomial Logistic Regression | Asymptomatic | 0.84 | 0.84 | 0.96 | 0.84 | 0.98 |
|  | CD226 |  | Symptomatic | 0.9 | 0.86 | 0.9 | 0.94 | 0.86 |
| MGUS | KRT78, APOC1 | Linear SVM |  | 0.91 | 0.93 | 1 | 0.9 | 0.83 | 1 | 0.9 |
|  |  | Logistic Regression |  | 0.96 | 0.96 | 1 | 0.94 | 0.93 | 1 | 0.99 |
|  |  | Decision Tree |  | 0.69 | 0.8 | 0.69 | 0.83 | 0.69 | 0.92 | 0.76 |
| Initial Diagnosis | ALAD, LGALS1 | Linear SVM |  | 0.77 | 0.78 | 0.83 | 0.73 | 0.71 | 0.85 | 0.89 |
|  |  | Logistic Regression |  | 0.85 | 0.85 | 0.81 | 0.89 | 0.89 | 0.88 | 0.91 |
|  |  | Decision Tree |  | 0.71 | 0.73 | 0.72 | 0.75 | 0.71 | 0.81 | 0.73 |
| Relapse | CD226 | Linear SVM |  | 0.92 | 0.9 | 0.92 | 0.88 | 0.92 | 0.88 | 0.93 |
|  |  | Logistic Regression |  | 0.88 | 0.89 | 0.87 | 0.91 | 0.89 | 0.93 | 0.95 |
|  |  | Decision Tree |  | 0.88 | 0.89 | 0.86 | 0.91 | 0.9 | 0.92 | 0.87 |


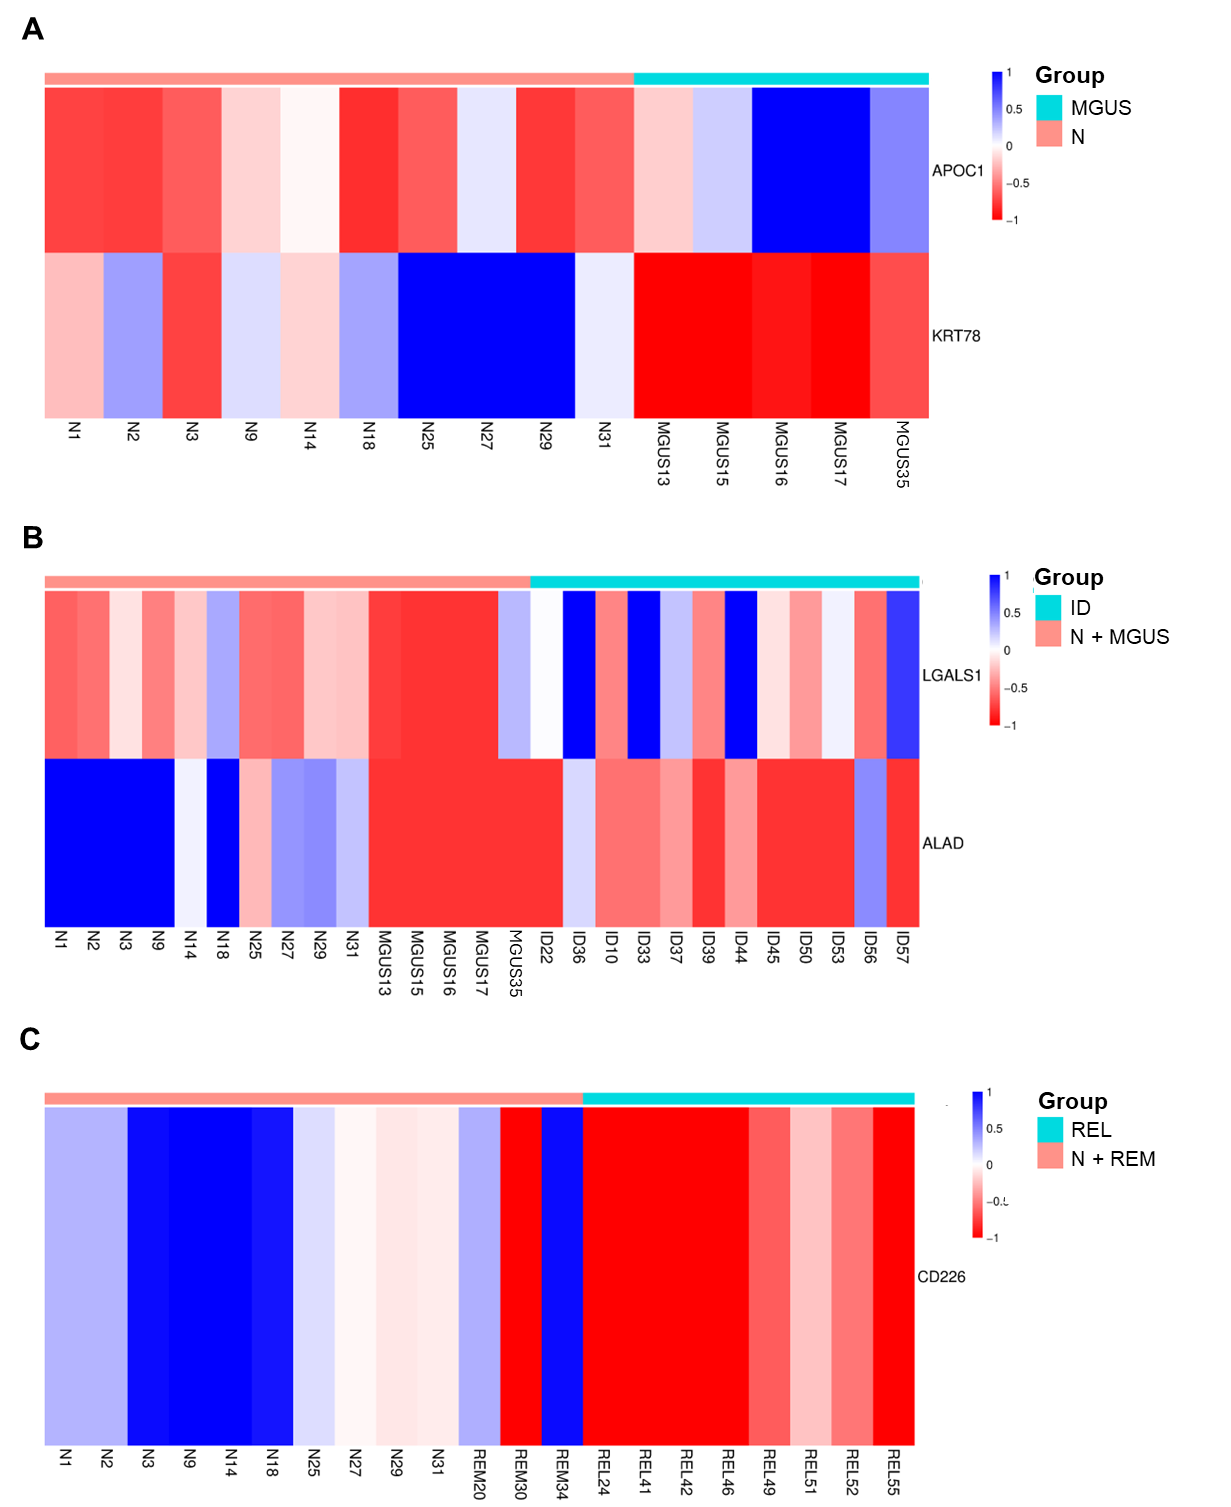


**Figure S5** Heatmaps of ML–selected protein markers in MM PB EVs. (A) APOC and KRT78 levels in MGUS samples, (B) ALAD and LGALS1 levels in initial diagnosis, and (C) CD226 levels in relapse, compared to their respective controls.
